# Supplementary material for: Drivers for low-value imaging: a qualitative study of stakeholders’ perspectives in Norway
Source: Springer Nature journal article supplement (doi:10.1186/s12913-023-09328-4), 2023-03-28
Supplement: MOESM1 [file 25170482]

**1. Experiences**

What are your reflections on the definition of low-value care? Can you provide some examples of examinations in your practice that will fall under this definition?

Can you tell me about your experience with low-value radiology?

What do you think are the most important reasons for using low-value examinations?

How do you think the following impact on the use of low-value services?

- Economics
- Organisational structures
  - o Systems
  - o Environmental mechanisms (access to services, demands, expectations)
  - o Imaging 'just to be sure'

Have you tried to reduce the use of low-value radiology? If so, what did you do, and how did the measure work?

- How was the measure received?
- Why do you think it worked/ did not work?

**2. Possible future measures**

In your opinion, what does it take to reduce the use of low-value radiology?

What does it take for the measure to work?

What can make measures unsuccessful?

How do you think the measures will be received, for example by:

- a. Colleagues
- b. Patients/next of kin
- c. Others

**3. Elaboration**

Is there anything else you think it is important for us to know or that you wish to elaborate?

1. Andersen ER, Hofmann BM, Kjelle E: **Reducing low-value radiological services in Norway –a qualitative multi-professional study on measures and facilitators for change.** *BMC Health Services Research* 2022, **22**(1):678.
