# Supplementary material for: Drivers for low-value imaging: a qualitative study of stakeholders’ perspectives in Norway
Source: Springer Nature journal article supplement (doi:10.1186/s12913-023-09328-4), 2023-03-28
Supplement: MOESM2 [file 25170482]

**Additional file 2: Original framework [1]**

|            |                                        |
|------------|----------------------------------------|
| <b>1.0</b> | <b>Health policy and organization</b>  |
| 1.1        | Politics                               |
| 1.2        | Laws and regulations                   |
| 1.3        | Government                             |
| 1.4        | Social economics                       |
| 1.5        | Organisation of healthcare services    |
| 1.6        | Access to services                     |
| 1.7        | Capacity and prioritising              |
| 1.8        | Resources                              |
| 1.9        | Logistics                              |
| 1.10       | Financial incentives                   |
| 1.11       | Guidelines and patient pathways        |
| 1.12       | Routines                               |
| 1.13       | Roles and tasks                        |
| 1.14       | Time constrains                        |
| 1.15       | Patient economics                      |
| 1.16       | Justice                                |
| 1.17       | Dignity                                |
| 1.18       | Management                             |
|            |                                        |
| <b>2.0</b> | <b>Quality in health care services</b> |
| 2.1        | Value for patients and next of kin     |
| 2.2        | Value for referrers                    |
| 2.3        | Value for society                      |
| 2.4        | Estimation of benefits vs. costs       |
| 2.5        | Referral quality                       |
| 2.6        | Efficiency vs. quality                 |
| 2.7        | Risks                                  |
| 2.8        | Quality indicators                     |
|            |                                        |

|            |                                                      |
|------------|------------------------------------------------------|
| <b>3.0</b> | <b>Knowledge and competence</b>                      |
| 3.1        | Knowledge                                            |
| 3.2        | Competence                                           |
| 3.3        | Lack of competence                                   |
| 3.4        | Research                                             |
| 3.5        | Evidence                                             |
| 3.6        | Opportunity to stay up to date                       |
| 3.7        | Access to information                                |
|            |                                                      |
| <b>4.0</b> | <b>Interaction and communication</b>                 |
| 4.1        | Dialogue between patient and referrer                |
| 4.2        | Dialogue between hospital referrers and radiologists |
| 4.3        | Dialogue between GPs and radiologists                |
| 4.4        | Dialogue between colleagues in the same discipline   |
| 4.5        | Trust                                                |
| 4.6        | Co-selection                                         |
| 4.7        | Interaction                                          |
| 4.8        | IT-systems                                           |
|            |                                                      |
| <b>5.0</b> | <b>Attitude and culture</b>                          |
| 5.1        | Prioritisation challenges                            |
| 5.2        | Expectations to the radiological department          |
| 5.3        | Defensive medicine                                   |
| 5.4        | Management of uncertainties                          |
| 5.5        | Examination hierarchy                                |
| 5.6        | Professional ambition                                |
| 5.7        | Market-driven thinking                               |
| 5.8        | Expectations and desires                             |
| 5.9        | Resignation                                          |
| 5.10       | Awareness                                            |
| 5.11       | Willingness to change                                |
| 5.12       | Discretionarily assessments                          |

|            |                                                |
|------------|------------------------------------------------|
| 5.13       | Healthcare professionals' authority            |
|            |                                                |
| <b>6.0</b> | <b>Measures for reducing low-value imaging</b> |
| 6.1        | Consciousness-raising                          |
| 6.2        | Better interaction                             |
| 6.3        | Better communication                           |
| 6.4        | Guidelines and patient pathways                |
| 6.5        | Decision support                               |
| 6.6        | Internal invoicing                             |
| 6.7        | Dedicated imaging slots                        |
| 6.8        | Revisions                                      |
| 6.9        | Common IT-systems                              |
| 6.10       | Referral assessment                            |
| 6.11       | Feedback/guidance                              |
| 6.12       | Rejections                                     |
| 6.13       | Education and courses                          |
| 6.14       | Discussion groups                              |
| 6.15       | Await/make plans                               |
| 6.16       | Change the financial system                    |
| 6.17       | Change in management                           |
| 6.18       | Right to order imaging                         |
| 6.19       | Multimodal measures                            |
|            |                                                |
| <b>7.0</b> | <b>Measure characteristics /effects</b>        |
| 7.1        | Process                                        |
| 7.2        | Complexity                                     |
| 7.3        | Respect/ownership                              |
| 7.4        | Targeted                                       |
| 7.5        | Include relevant parties                       |
| 7.6        | Duration/effect                                |
| 7.7        | Simple and low resource-intensive              |
| 7.8        | Awareness                                      |

|      |                                         |
|------|-----------------------------------------|
| 7.9  | Whom the measure should be directed to  |
| 7.10 | How the measure is received/experienced |
| 7.11 | Enforceability                          |

## Reference

1. Andersen ER, Hofmann BM, Kjelle E: **Reducing low-value radiological services in Norway –a qualitative multi-professional study on measures and facilitators for change.** *BMC Health Services Research* 2022, **22**(1):678.
