# Supplementary material for: Drivers for low-value imaging: a qualitative study of stakeholders’ perspectives in Norway
Source: Springer Nature journal article supplement (doi:10.1186/s12913-023-09328-4), 2023-03-28
Supplement: MOESM3 [file 25170482]

### Additional file 3: New framework

|            |                                              |
|------------|----------------------------------------------|
| <b>1.0</b> | <b>Health policy and organization</b>        |
| 1.1        | Organisation of healthcare services          |
| 1.2        | Financial incentives                         |
| 1.3        | Guidelines and patient pathways              |
| 1.4        | Time constrains                              |
| 1.5        | Dignity                                      |
| 1.6        | Roles and tasks                              |
| 1.7        | IT-systems                                   |
|            |                                              |
| <b>2.0</b> | <b>Quality in the health care system</b>     |
| 2.1        | Value for patients and next of kin/referrers |
| 2.2        | Estimation of benefits vs. costs             |
| 2.3        | Referral quality                             |
| 2.4        | Competence                                   |
| 2.5        | Dialogue between patient and referrer        |
| 2.6        | Dialogue between referrer and radiologists   |
| 2.7        | Interaction                                  |
| 2.8        | Referral assessment                          |
|            |                                              |
| <b>3.0</b> | <b>Attitude and culture</b>                  |
| 3.1        | Prioritisation challenges                    |
| 3.2        | Defensive medicine                           |
| 3.3        | Examination hierarchy                        |
| 3.4        | Market-driven thinking                       |
| 3.5        | Expectations and desires (external)          |
| 3.6        | Resignation (internal motivation/ attitude)  |
